# Supplementary material for: Aggregation-induced emissions in the mesogenic BF2 complexes of aroylhydrazines
Source: Royal Society of Chemistry journal article supplement (doi:10.1039/d1nj02001c), 2021-01-01
Supplement: d1nj02001c1.pdf [file d1nj02001c1.pdf]

## Aggregation-induced emissions in mesogenic BF<sub>2</sub> complexes

Yi-Hong Cai<sup>a</sup>, Hsin-Yun Chih<sup>a</sup>, Gene-Hsiang Lee<sup>b</sup>, Chung K. Lai<sup>a\*</sup>

Fax: (+8862)-03-4277664; (+886)-03-4259207 ext. 65904; e-mail: cklai@cc.ncu.edu.tw

<sup>a</sup> Department of Chemistry, National Central University, Chung-Li 32011, Taiwan, ROC

<sup>b</sup> Instrumentation Center, National Taiwan University, Taipei 10660, Taiwan, ROC

### Table of Contents

1. The <sup>1</sup>H, <sup>13</sup>C and <sup>19</sup>F NMR spectra of compounds **1a**, **1b**, **1a-BF<sub>2</sub>** and **1b-BF<sub>2</sub>** .....2
2. The DSC thermograph of complex **1a-BF<sub>2</sub>** (n = 8) .....19

# 1. The $^1\text{H}$ , $^{13}\text{C}$ and $^{19}\text{F}$ NMR spectra of compounds **1a**, **1b**, **1a-BF<sub>2</sub>** and **1b-BF<sub>2</sub>**

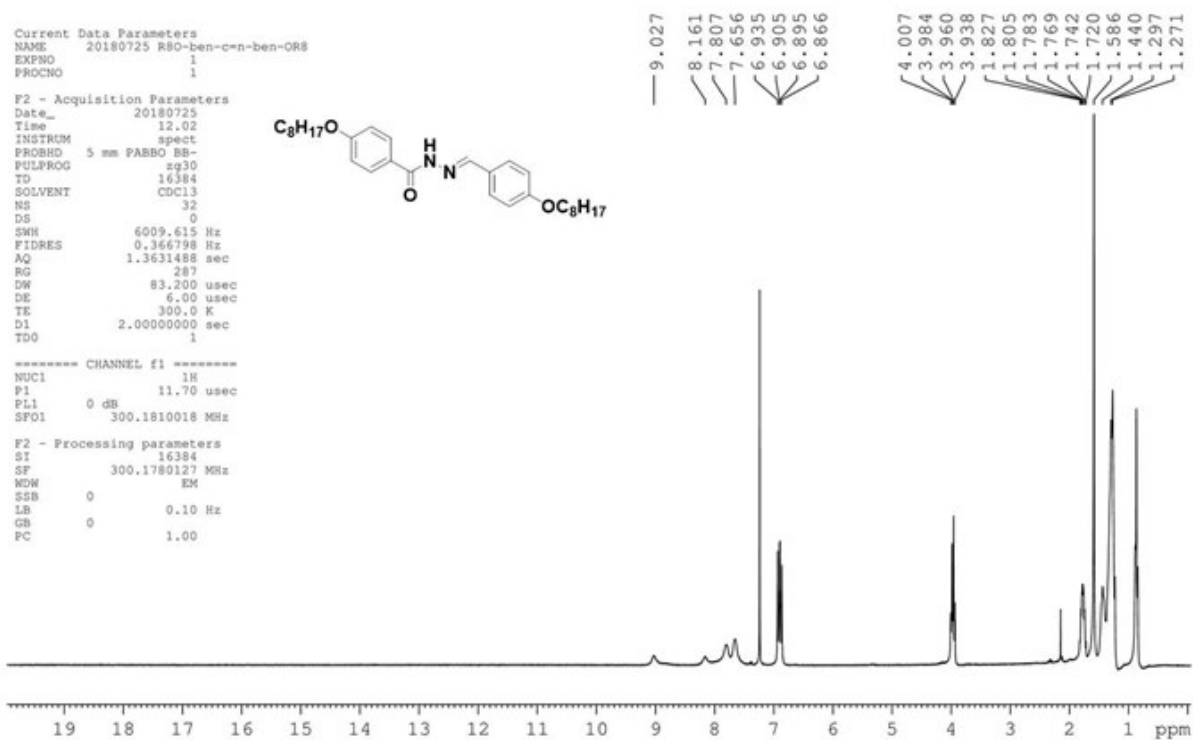

**Fig. S1** The  $^1\text{H}$  spectrum of compound **1a** ( $n = 8$ ).

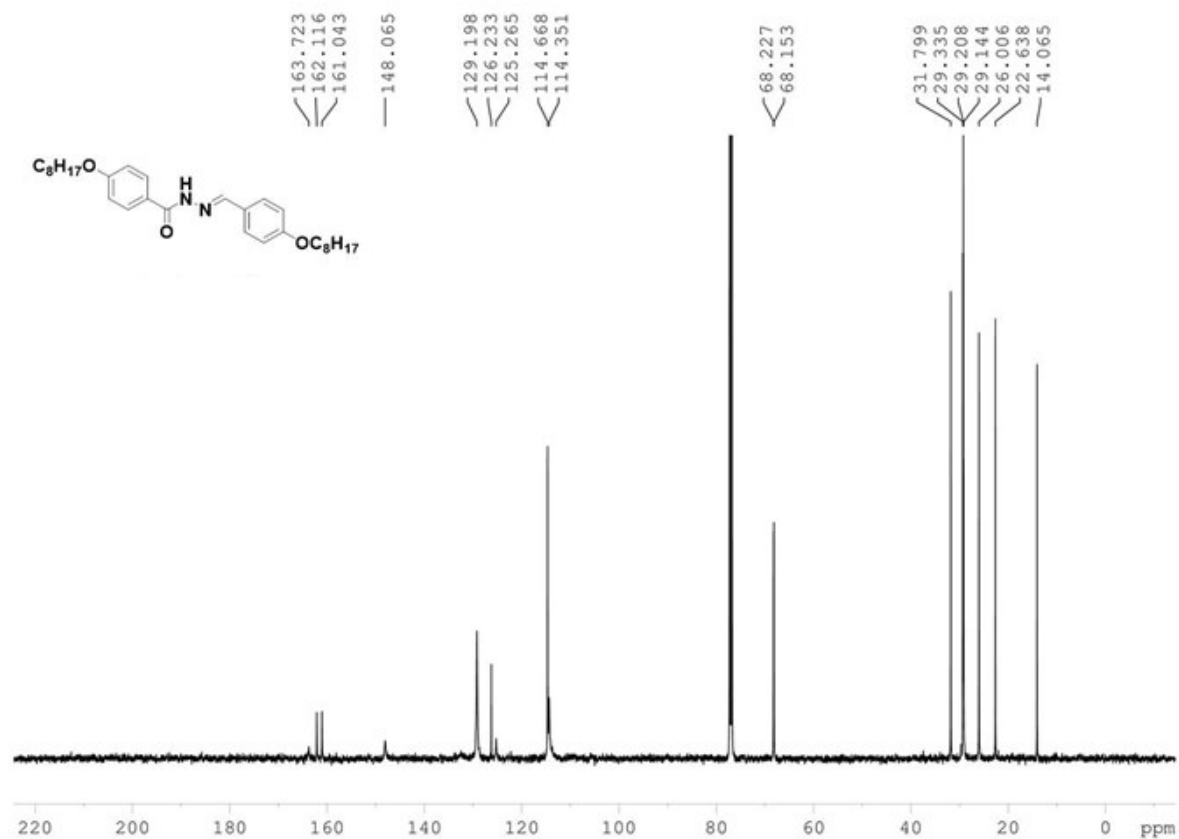

**Fig. S2** The  $^{13}\text{C}$  NMR spectrum of compound **1a** ( $n = 8$ ).

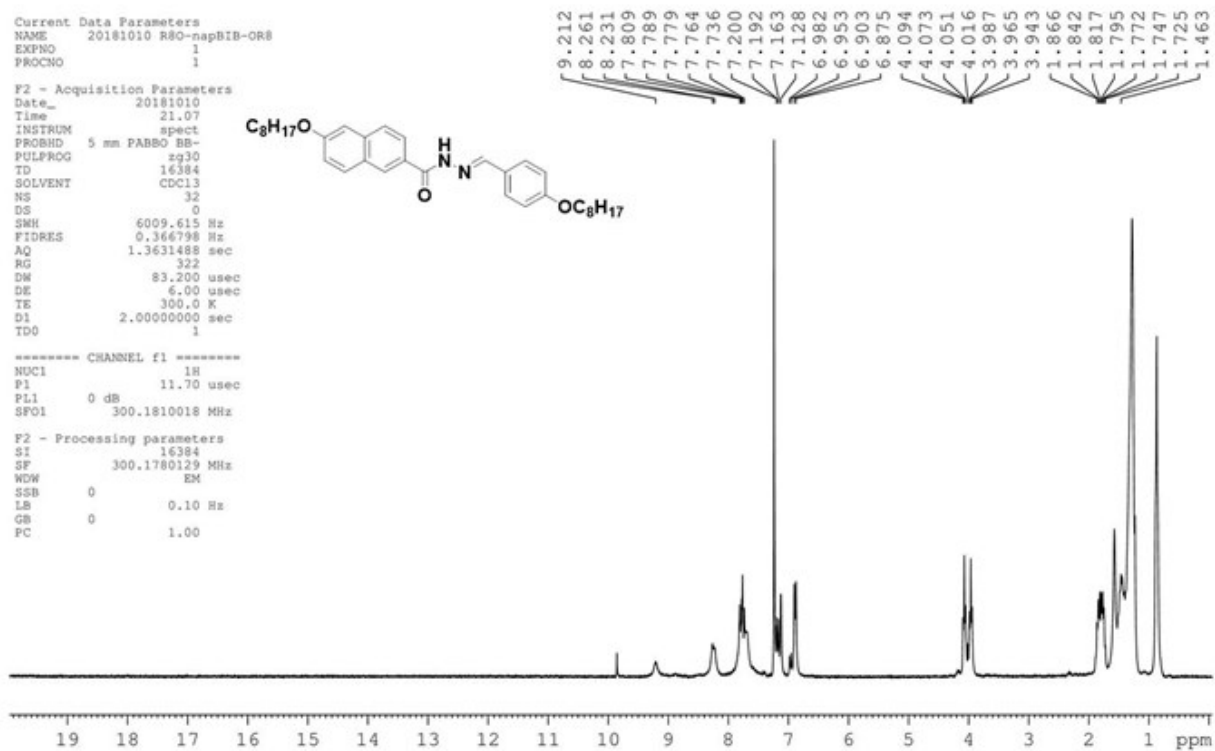

**Fig. S3** The  $^1\text{H}$  spectrum of compound **1b** (n = 8).

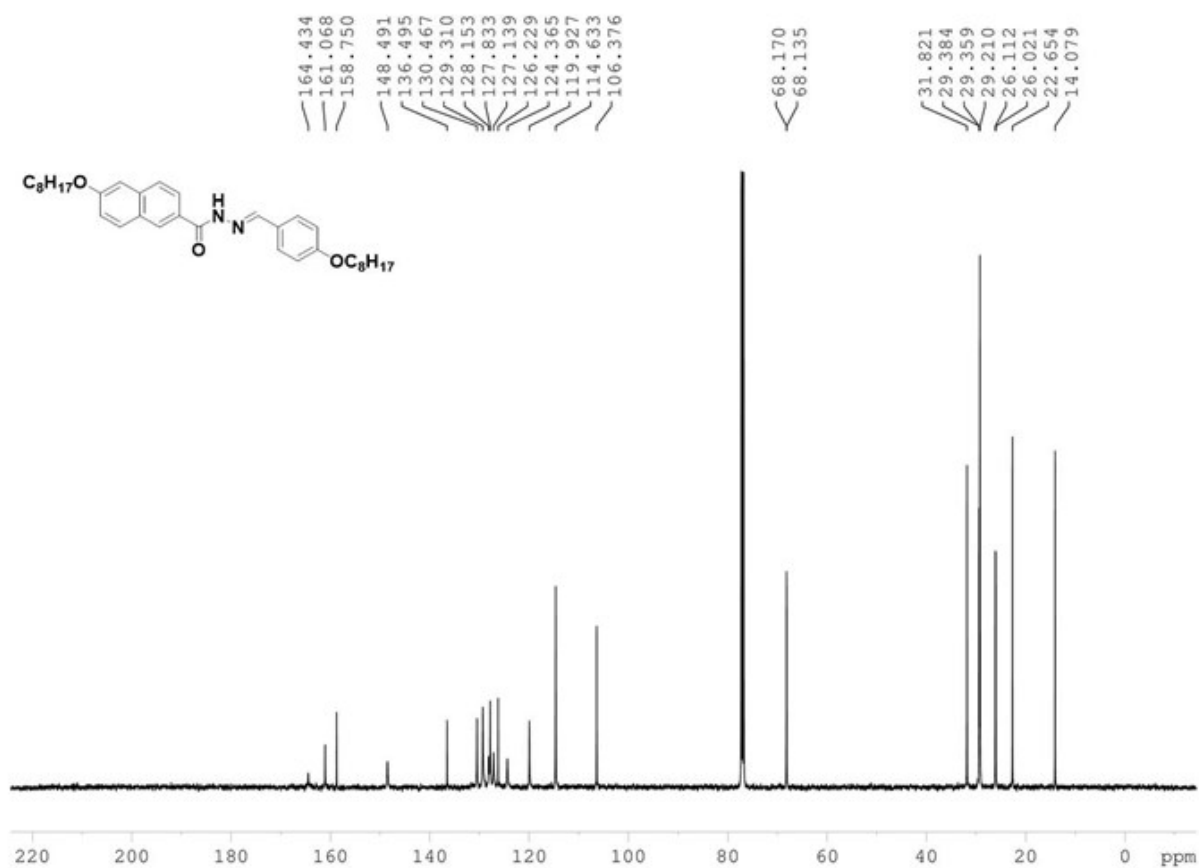

**Fig. S4** The  $^{13}\text{C}$  NMR spectrum of compound **1b** (n = 8).

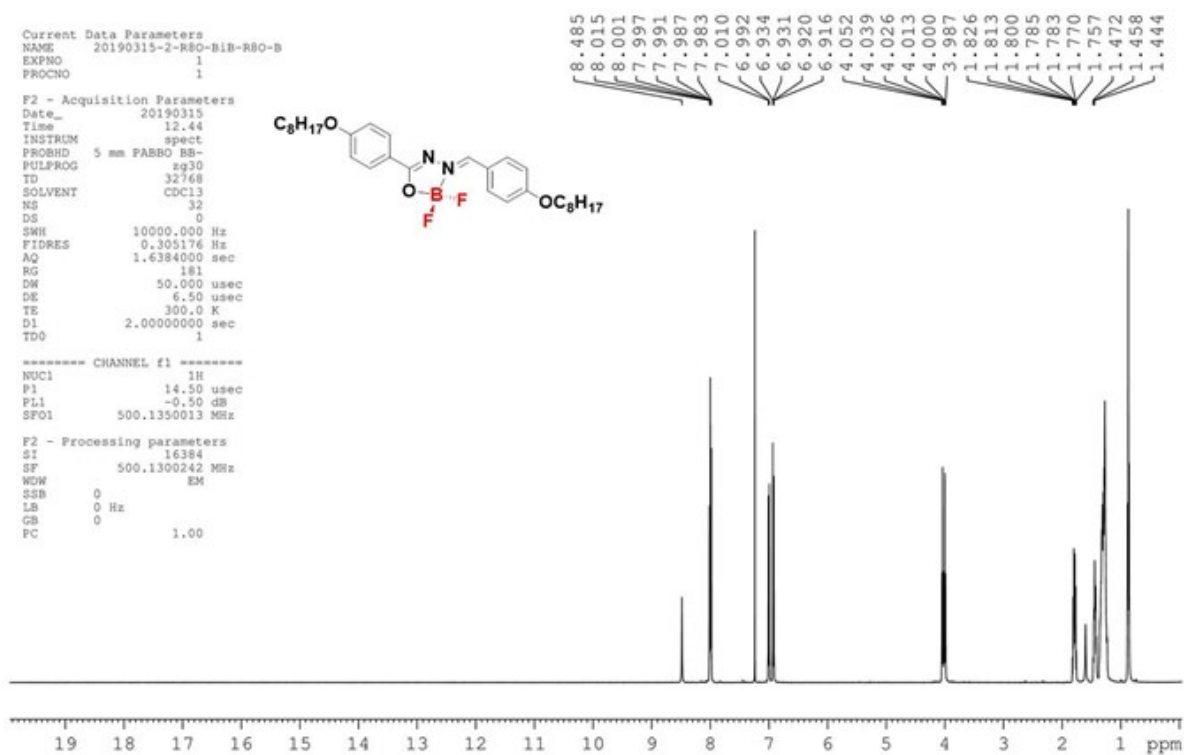

Fig. S5 The <sup>1</sup>H spectrum of compound **1a-BF<sub>2</sub>** (n = 8).

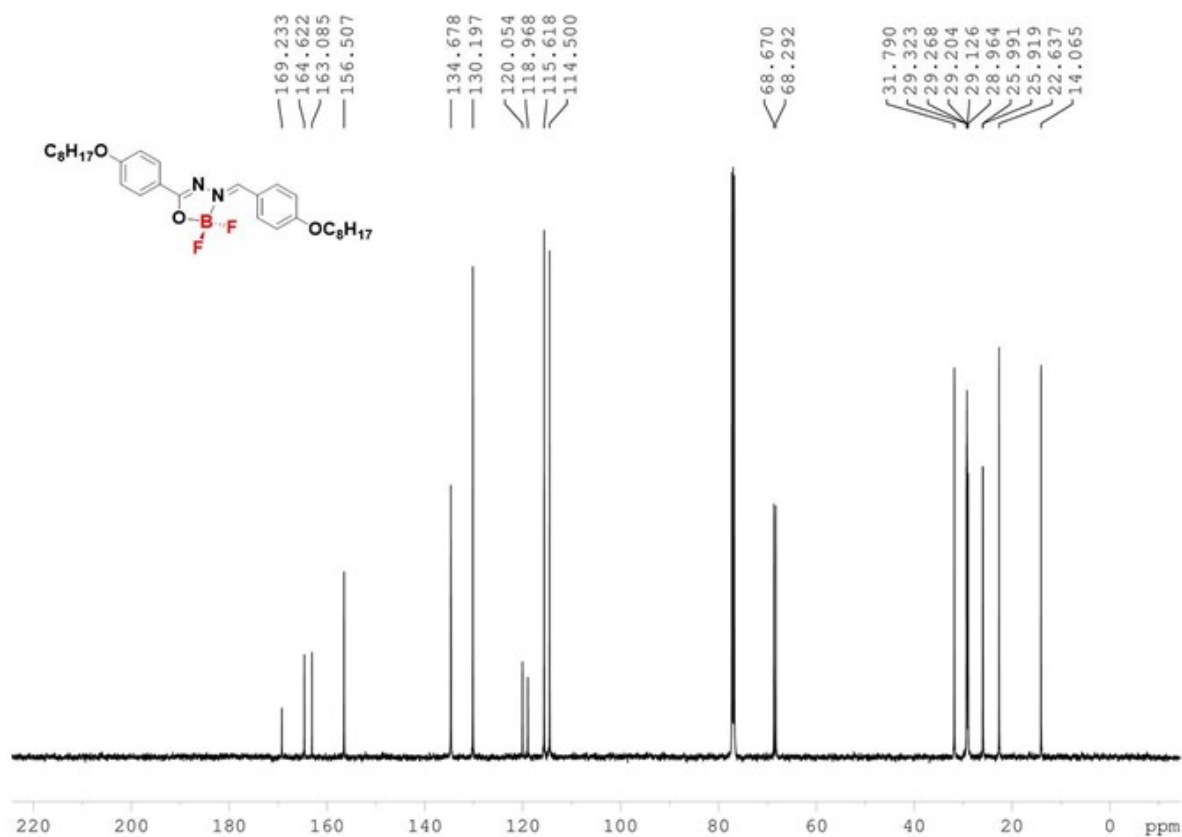

Fig. S6 The <sup>13</sup>C NMR spectrum of compound **1a-BF<sub>2</sub>** (n = 8).

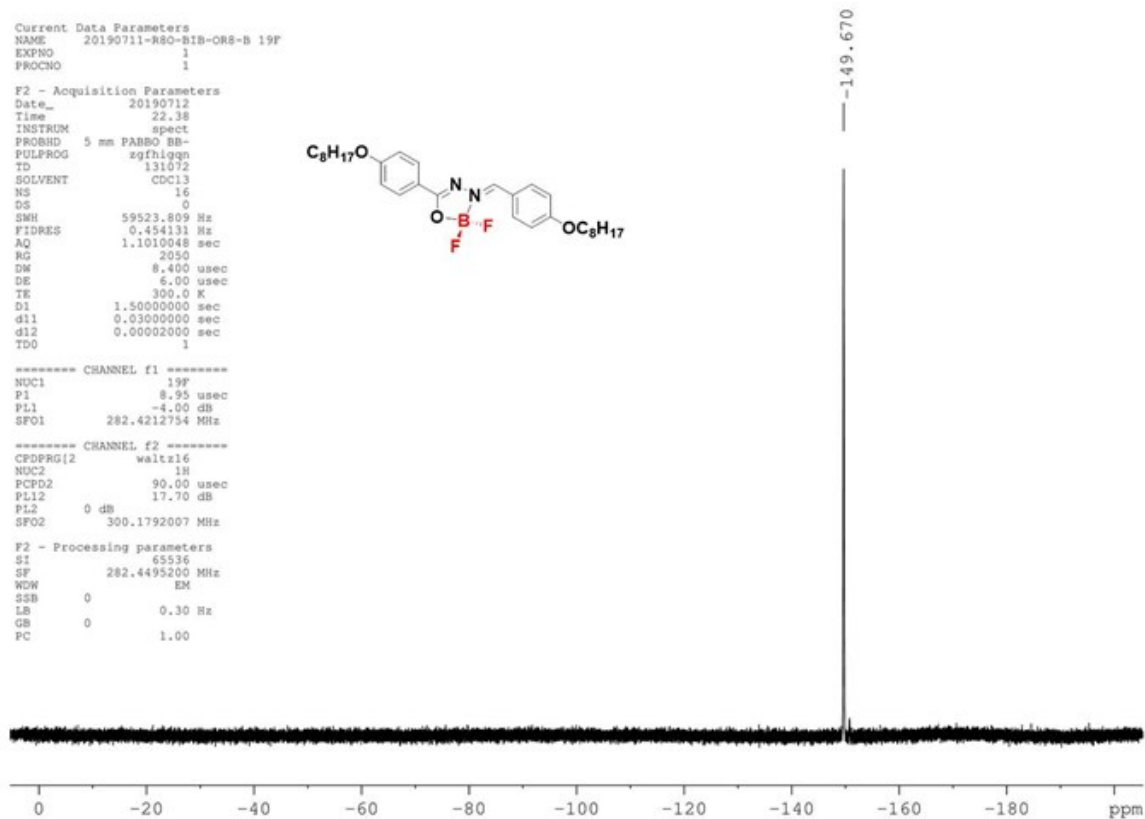

Fig. S7 The  $^{19}\text{F}$ -NMR spectrum of compound **1a-BF<sub>2</sub>** (n = 8).

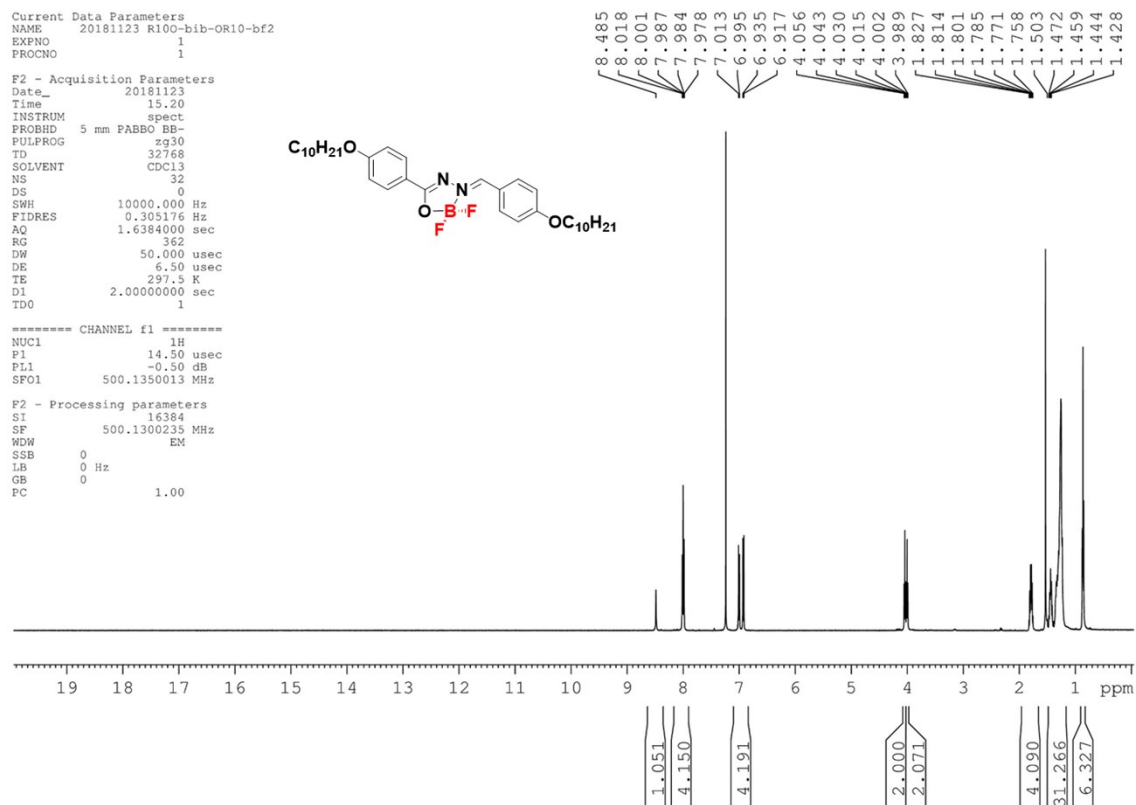

Fig. S8 The  $^1\text{H}$  spectrum of compound **1a-BF<sub>2</sub>** (n = 10).

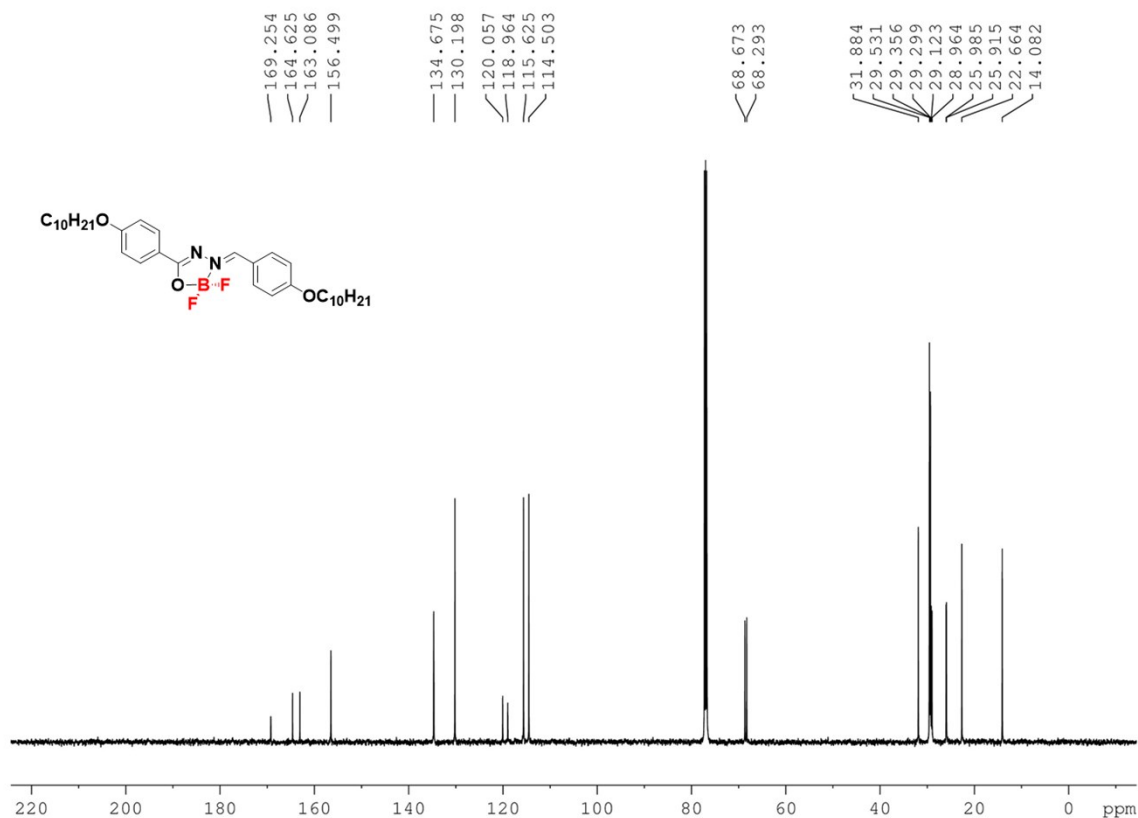

**Fig. S9** The <sup>13</sup>C NMR spectrum of compound **1a-BF<sub>2</sub>** (n = 10).

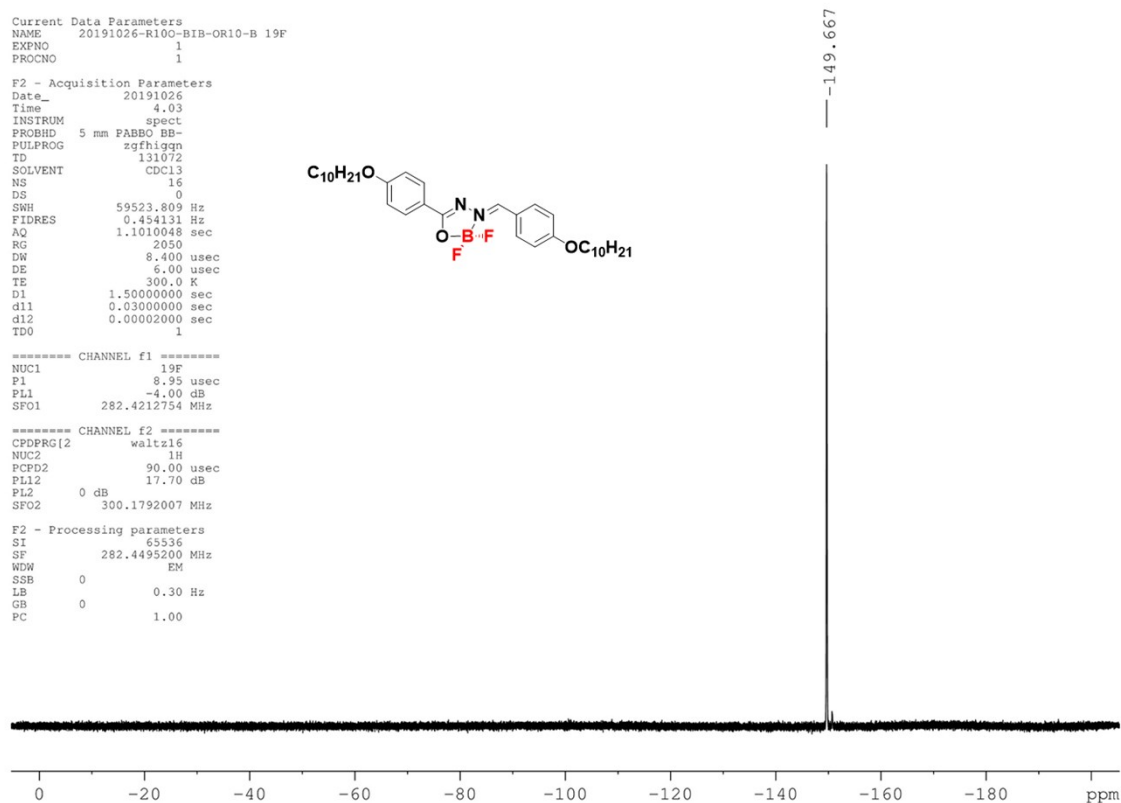

**Fig. S10** The <sup>19</sup>F-NMR spectrum of compound **1a-BF<sub>2</sub>** (n = 10).

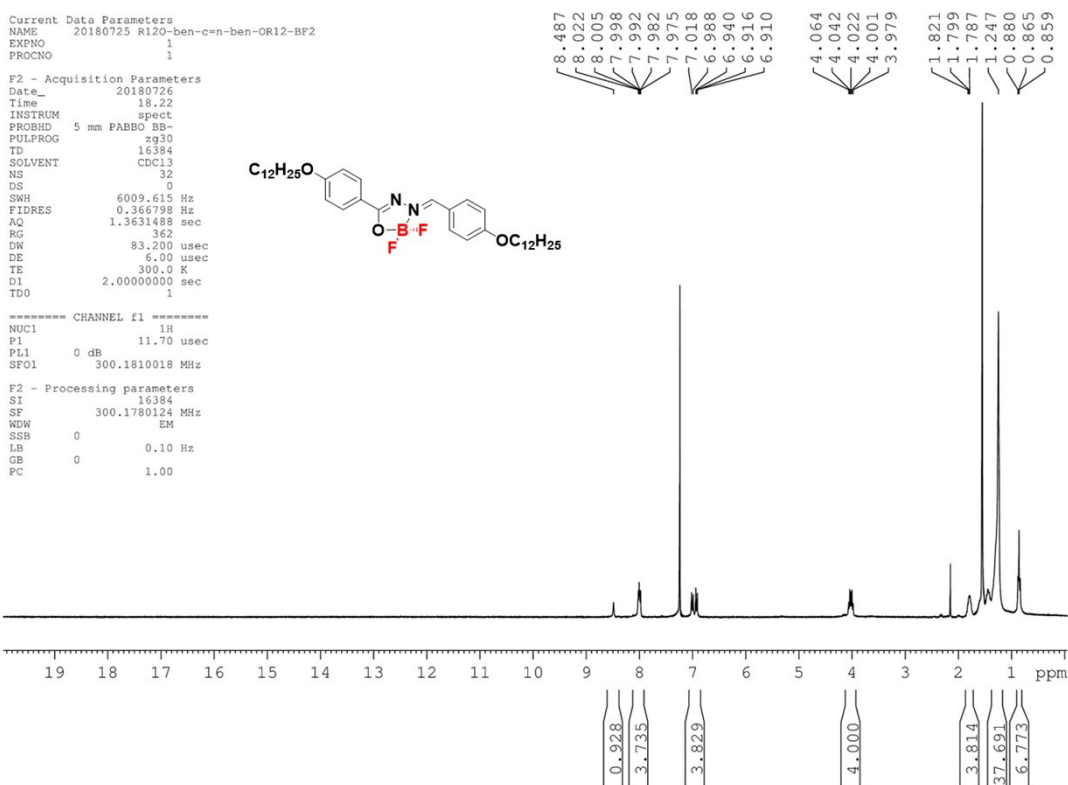

**Fig. S11** The <sup>1</sup>H spectrum of compound **1a-BF<sub>2</sub>** (n = 12)

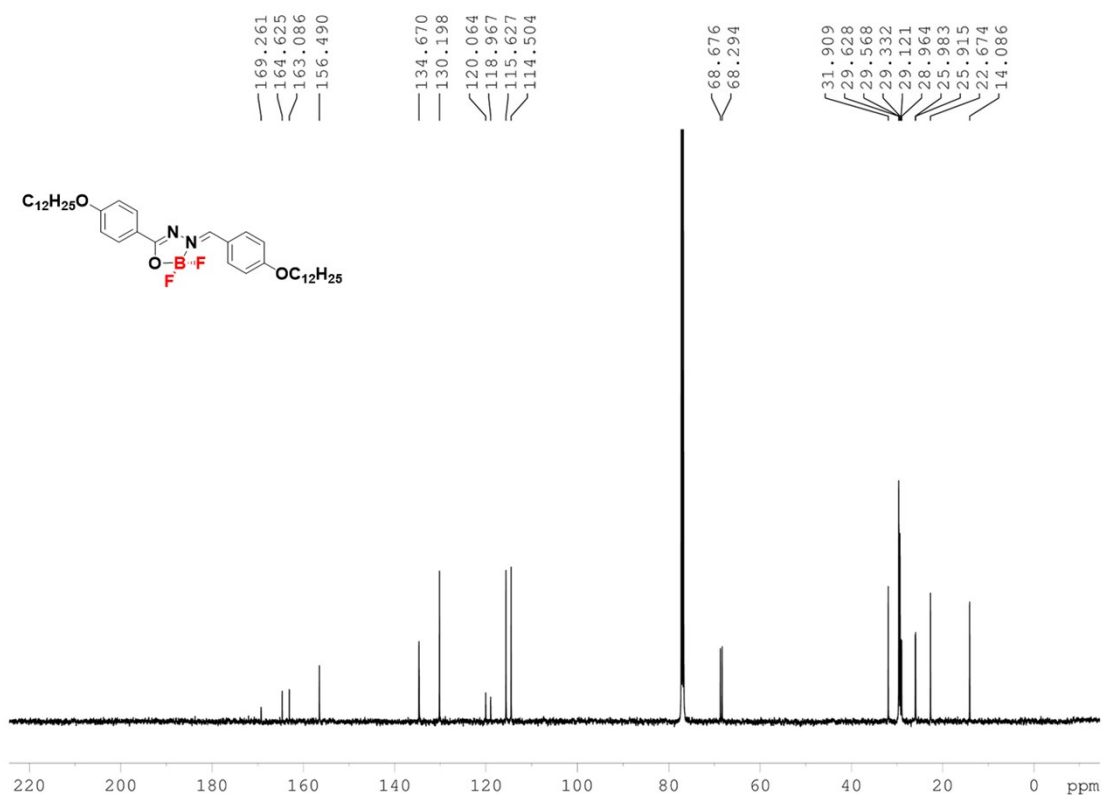

**Fig. S12** The <sup>13</sup>C NMR spectrum of compound **1a-BF<sub>2</sub>** (n = 12).

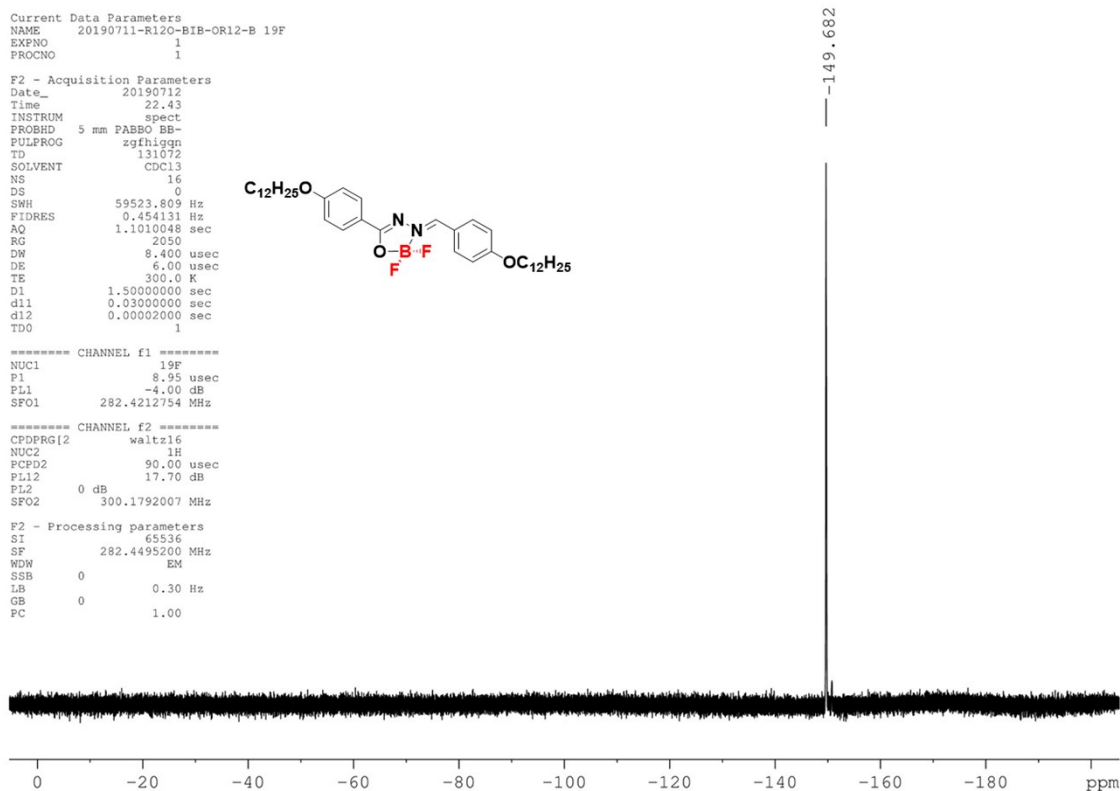

Fig. S13 The  $^{19}\text{F}$ -NMR spectrum of compound **1a-BF<sub>2</sub>** (n = 12).

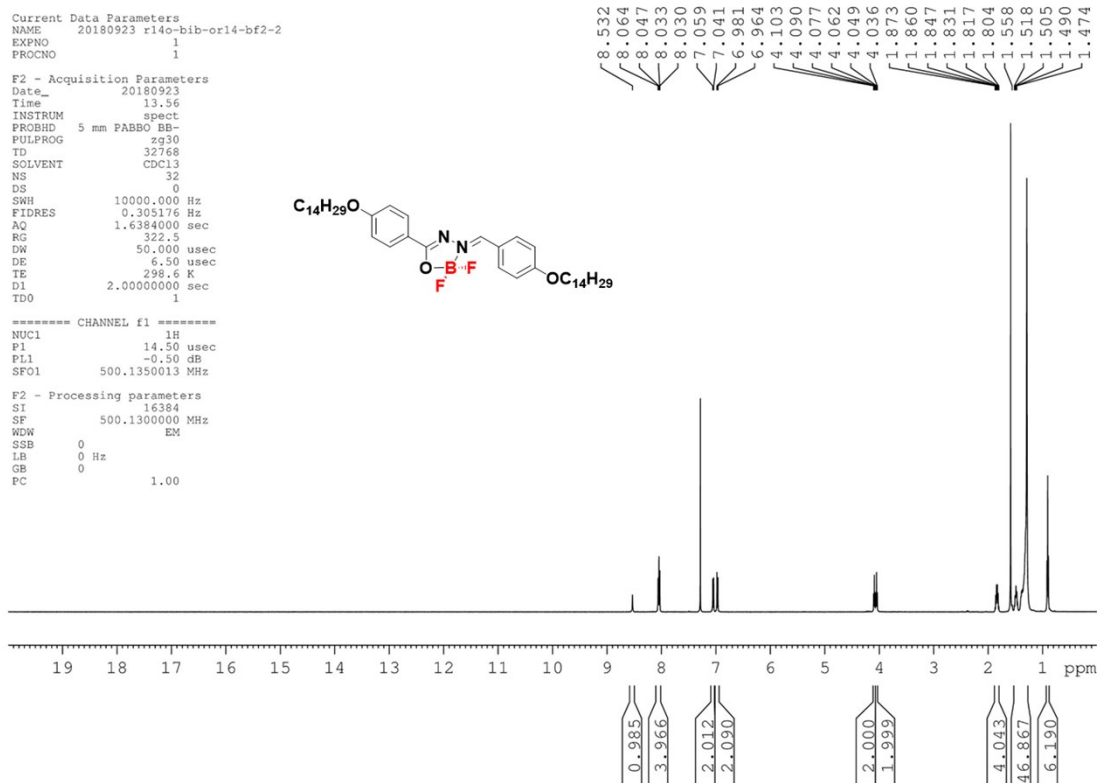

Fig. S14 The  $^1\text{H}$  spectrum of compound **1a-BF<sub>2</sub>** (n = 14).



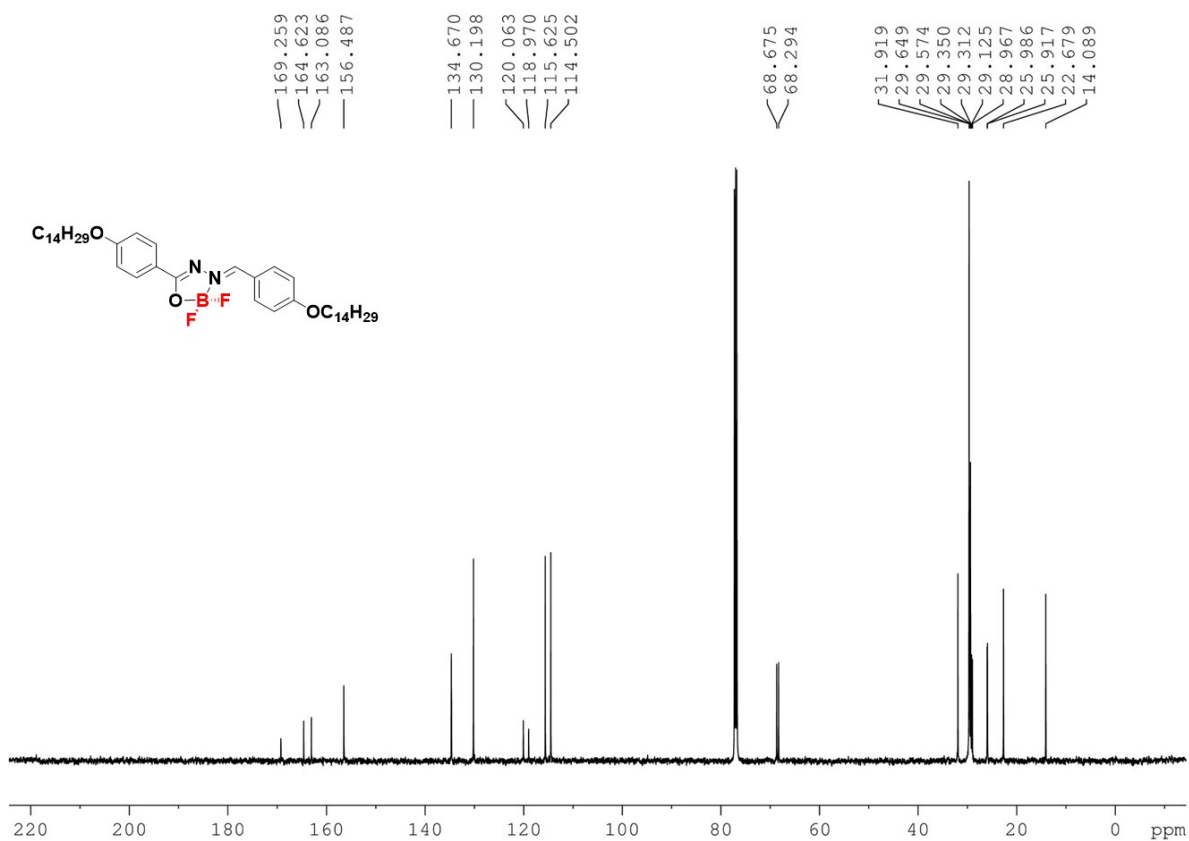

Fig. S15 The  $^{13}\text{C}$  NMR spectrum of compound **1a-BF<sub>2</sub>** (n = 14).

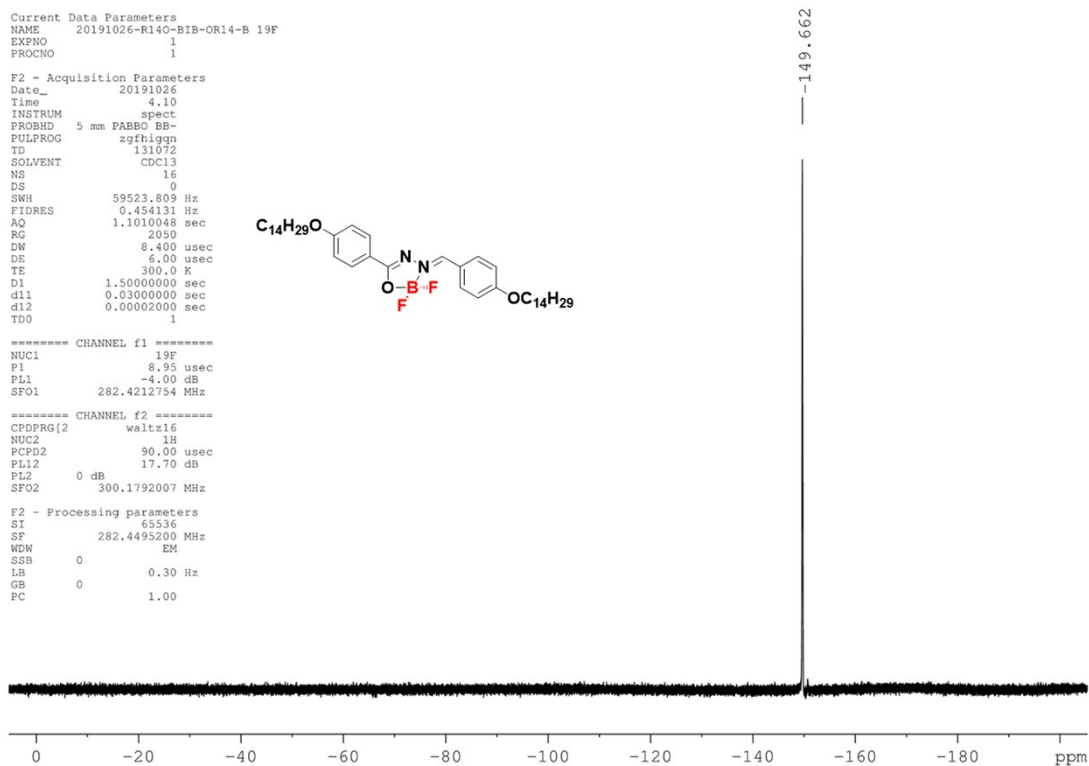

Fig. S16 The  $^{19}\text{F}$ -NMR spectrum of compound **1a-BF<sub>2</sub>** (n = 14).

```

Current Data Parameters
NAME      20190322-R160-BiB-R160-B
EXPNO     1
PROCNO    1

F2 - Acquisition Parameters
Date_     20190322
Time      11:19
INSTRUM   spect
PROBHD    5 mm PABBO BB-
PULPROG   zg30
TD         32768
SOLVENT   CDCl3
NS         32
DS         0
SWH        10000.000 Hz
FIDRES     0.305176 Hz
AQ         1.6384000 sec
RG         256
DW         50.000 usec
DE         6.50 usec
TE         300.0 K
D1         2.00000000 sec
TDO        1

===== CHANNEL f1 =====
NUC1       1H
P1         14.50 usec
PL1        -0.50 dB
SFO1       500.1350013 MHz

F2 - Processing parameters
SI         16384
SF         500.1300238 MHz
WDW        EM
SSB        0
LB         0 Hz
GB         0
PC         1.00

```

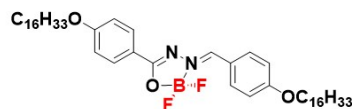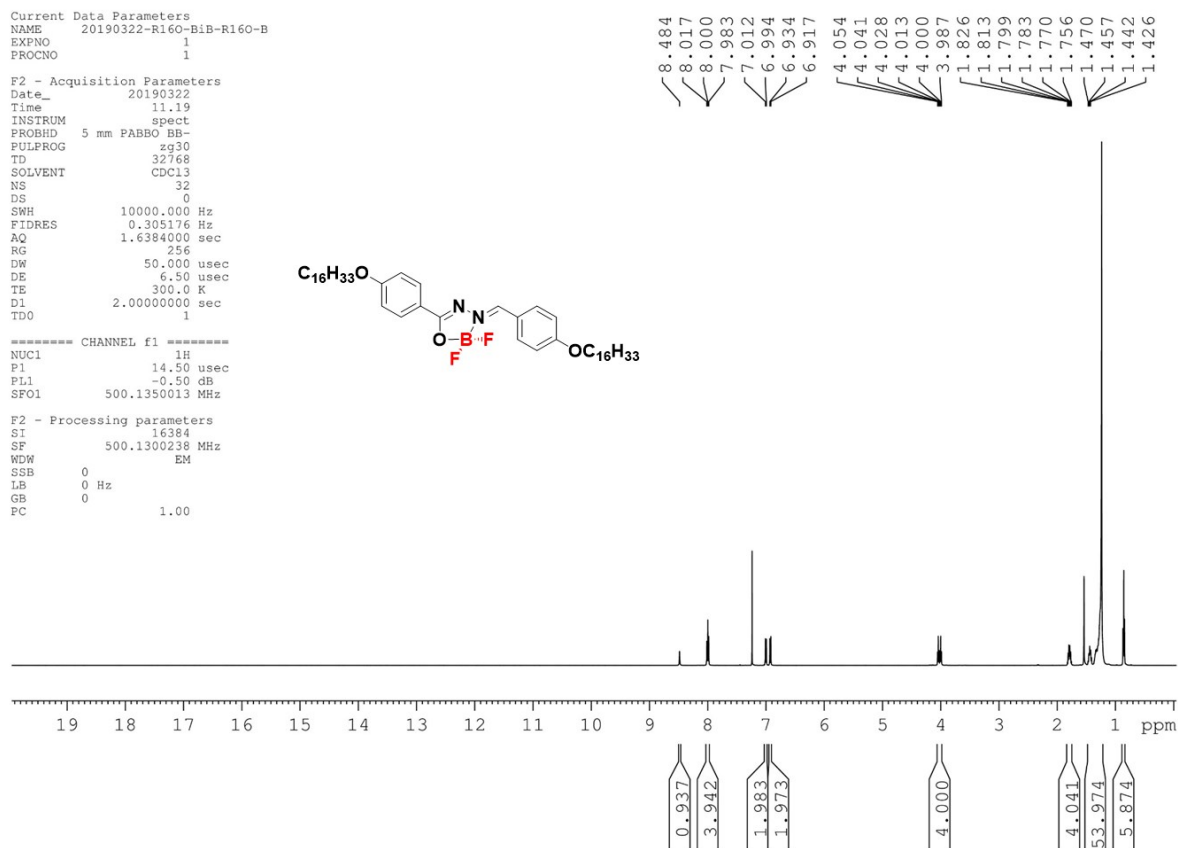

**Fig. S17** The  $^1\text{H}$  spectrum of compound **1a-BF<sub>2</sub>** ( $n = 16$ ).

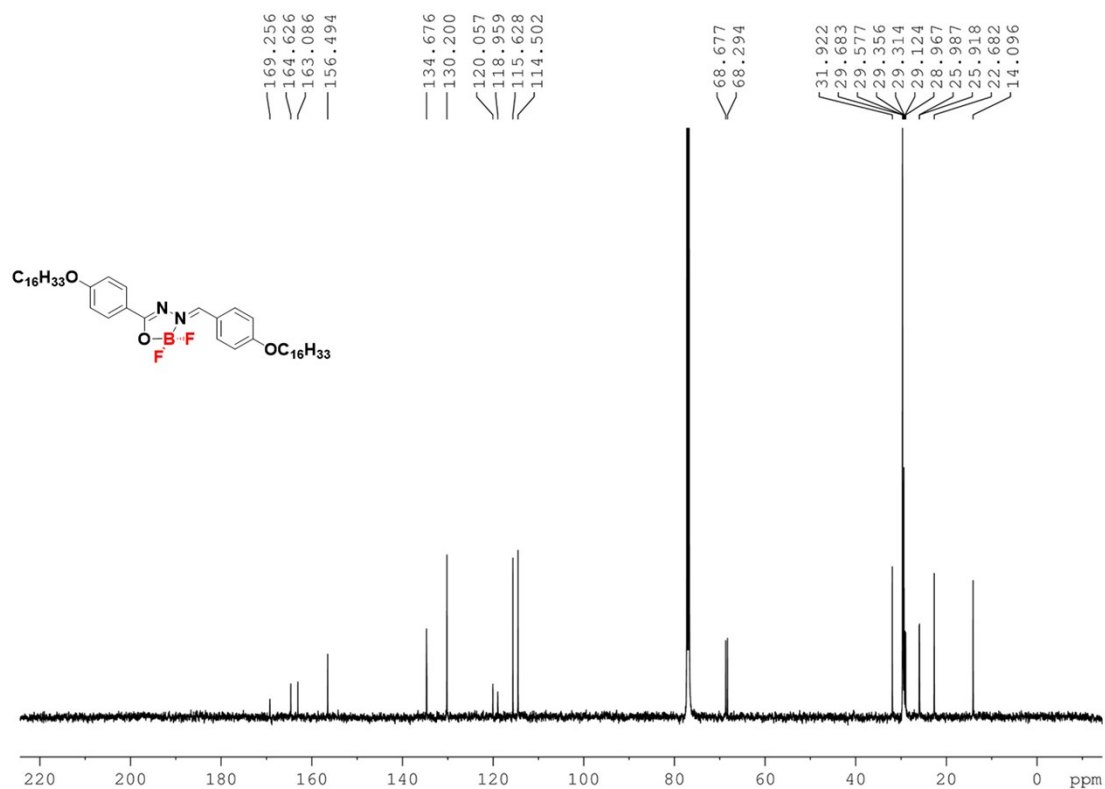

**Fig. S18** The  $^{13}\text{C}$  NMR spectrum of compound **1a-BF<sub>2</sub>** (n = 16).

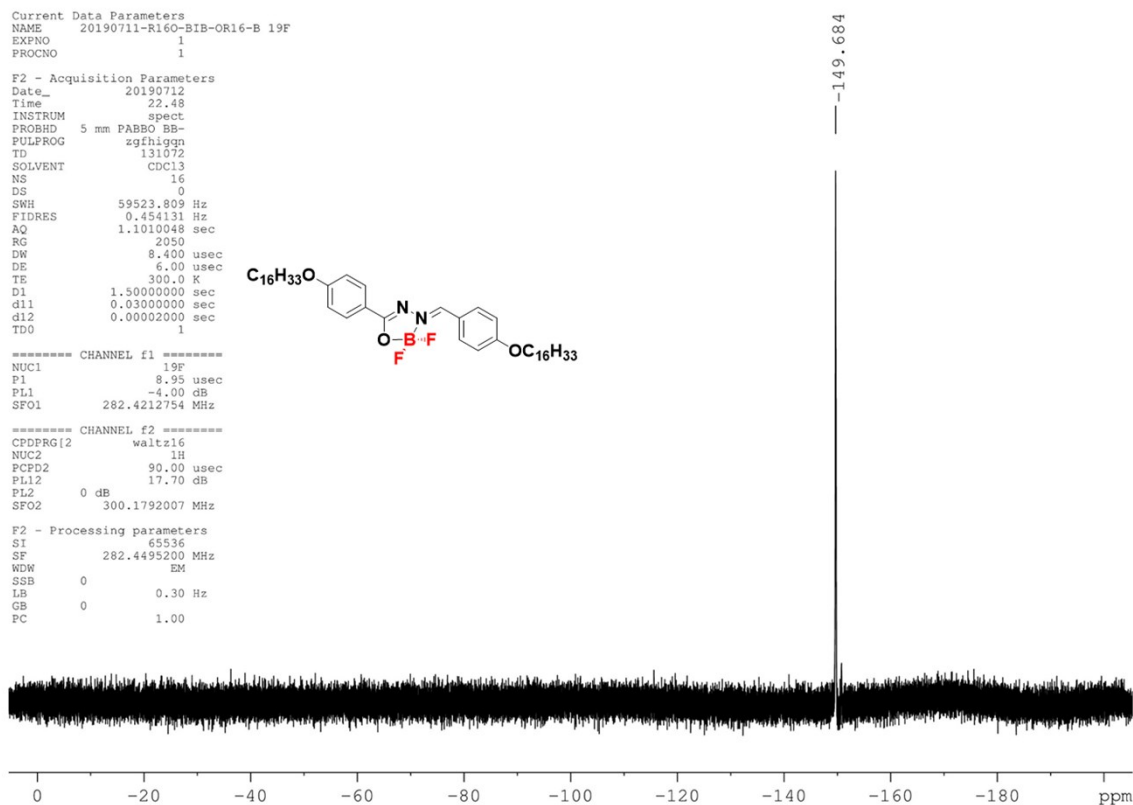

**Fig. S19** The  $^1\text{H}$ -NMR spectrum of compound **1a-BF<sub>2</sub>** (n = 16).

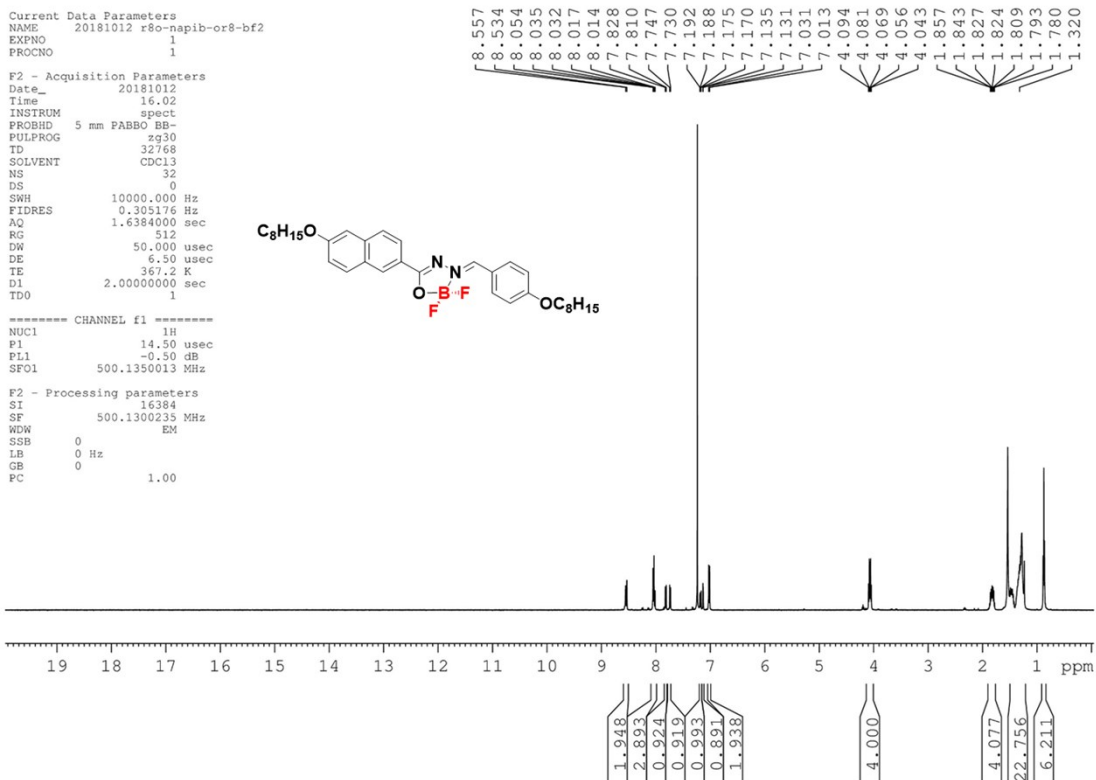

**Fig. S20** The  $^1\text{H}$  NMR spectrum of compound **1b-BF<sub>2</sub>** (n = 8).

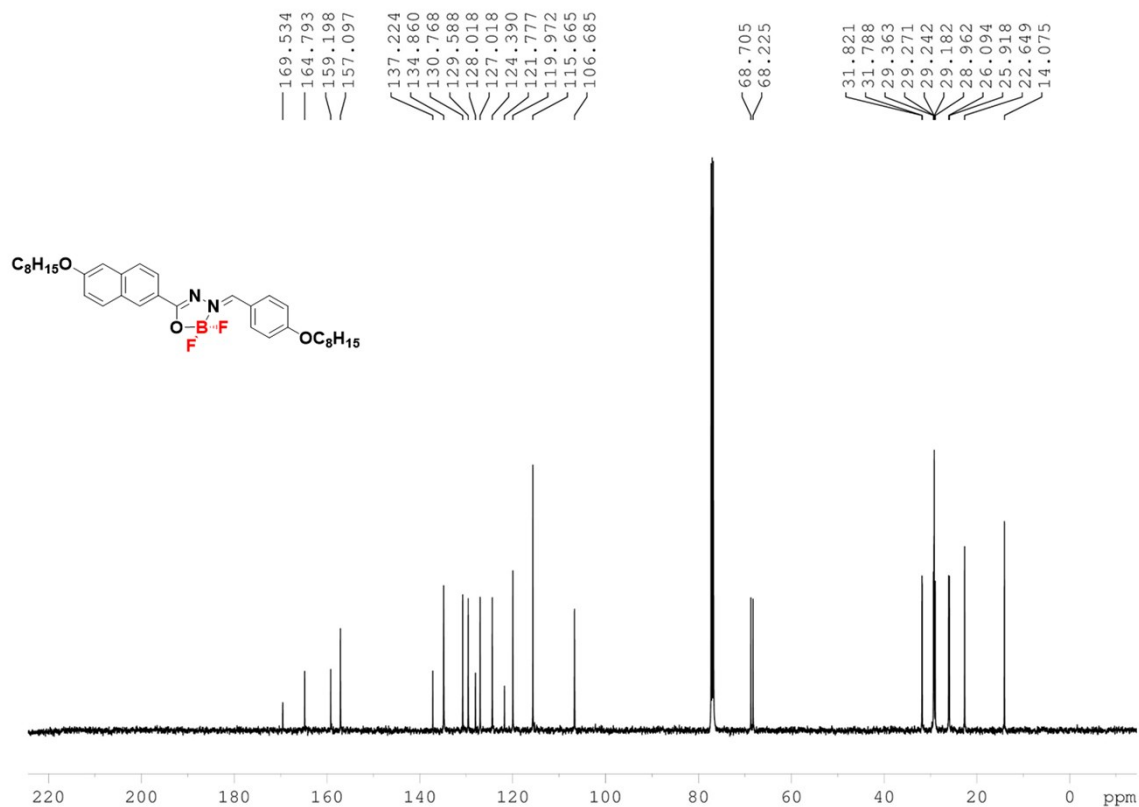

**Fig. S21** The  $^{13}\text{C}$  NMR spectrum of compound **1b-BF<sub>2</sub>** (n = 8).

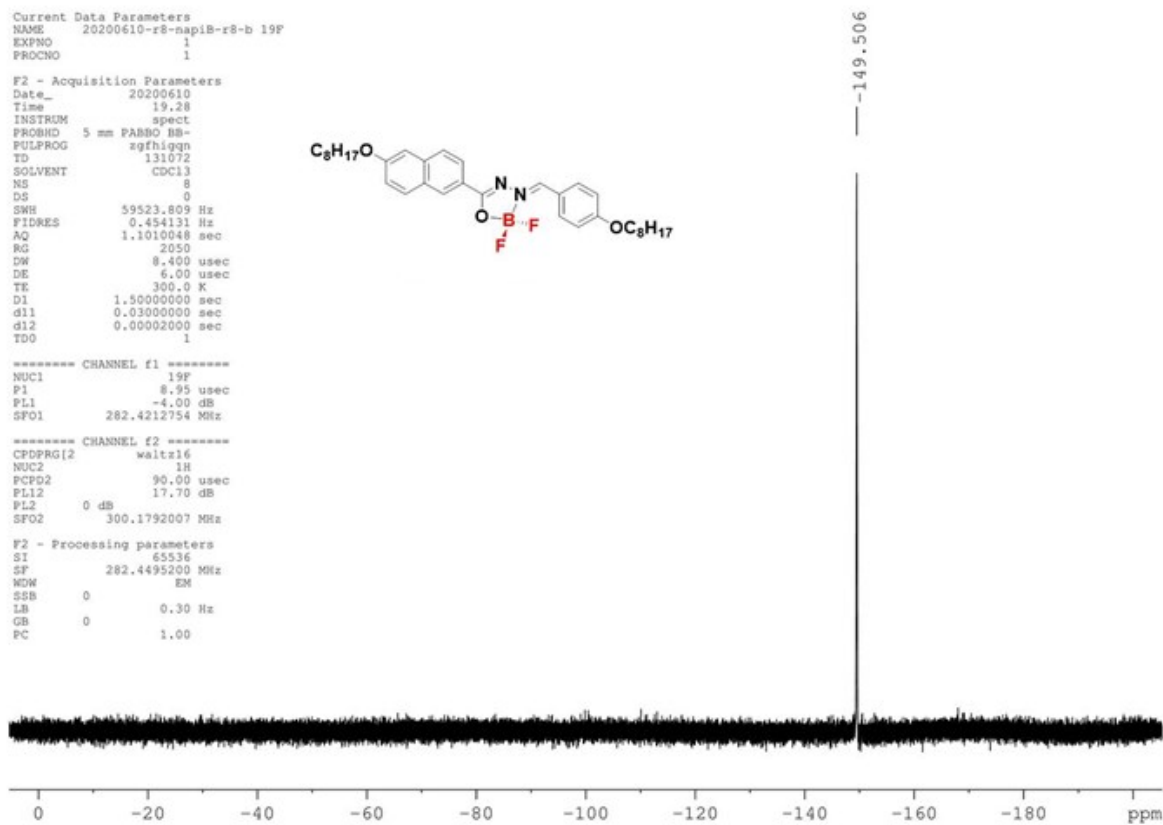

**Fig. S22** The  $^{19}\text{F}$  NMR spectrum of compound **1b-BF<sub>2</sub>** (n = 8).

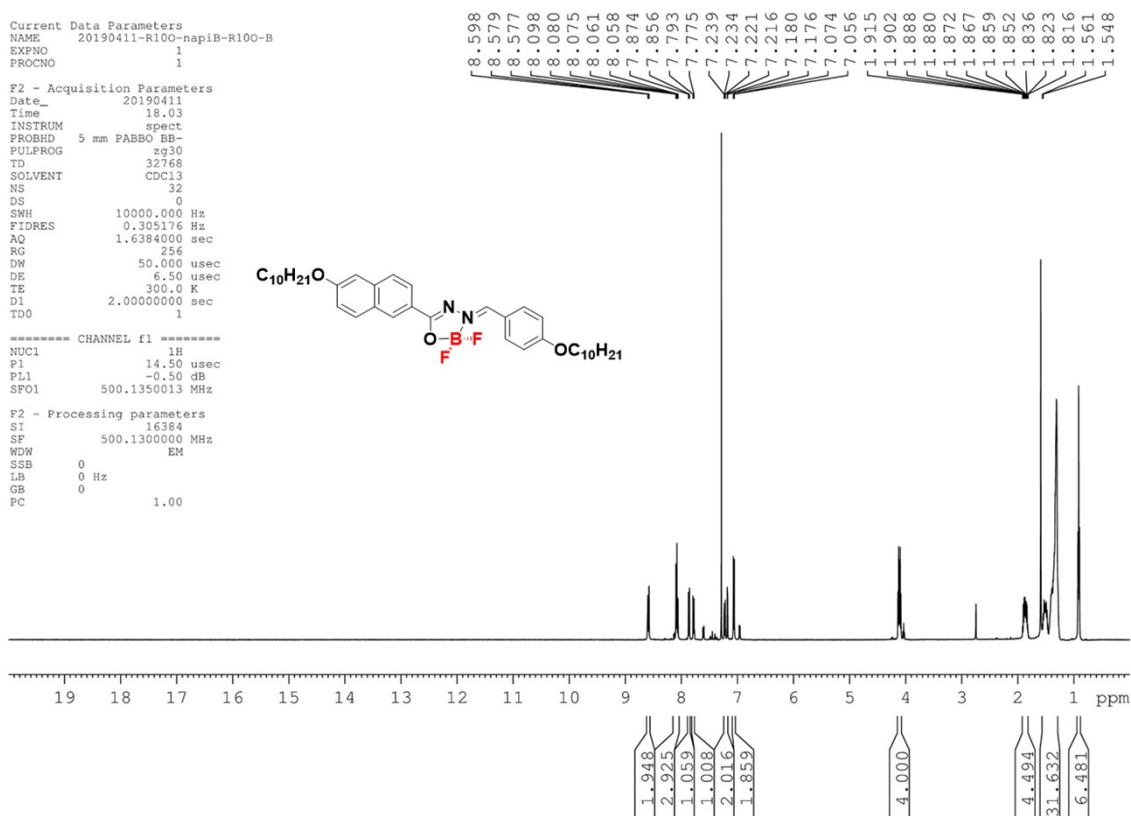

**Fig. S23** The  $^1\text{H}$  spectrum of compound **1b-BF<sub>2</sub>** (n = 10).

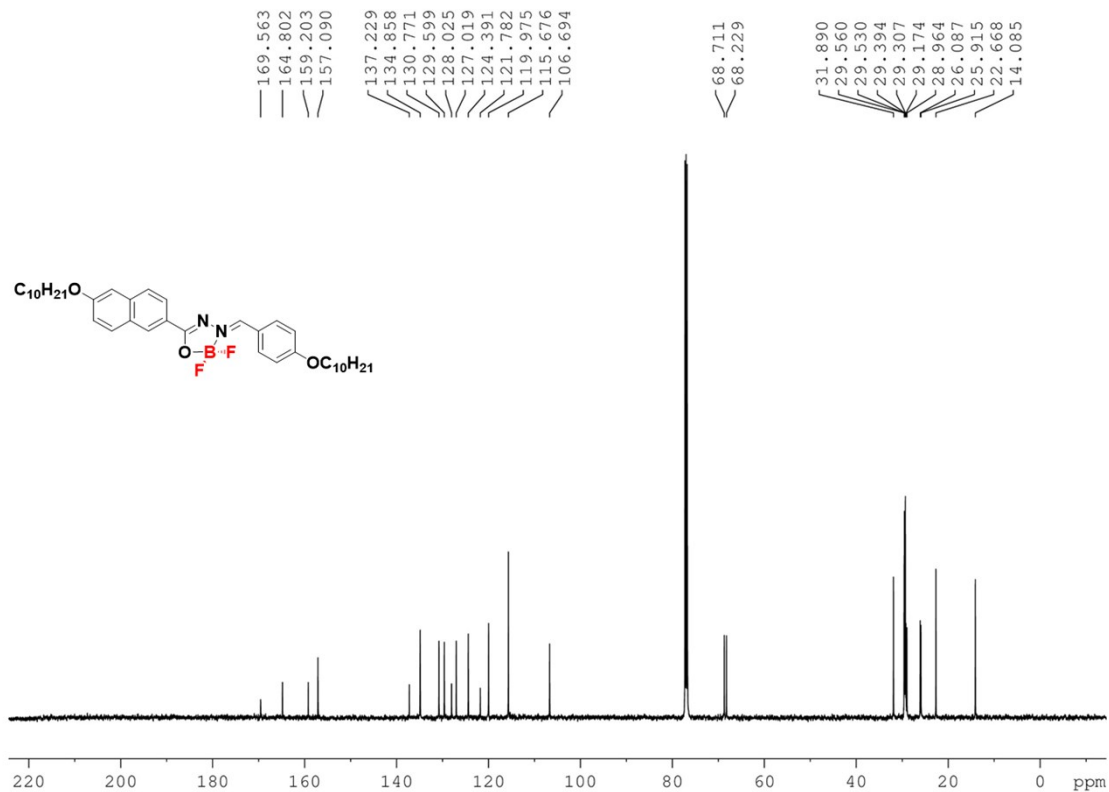

Fig. S24 The  $^{13}\text{C}$  NMR spectrum of compound **1b-BF<sub>2</sub>** (n = 10).

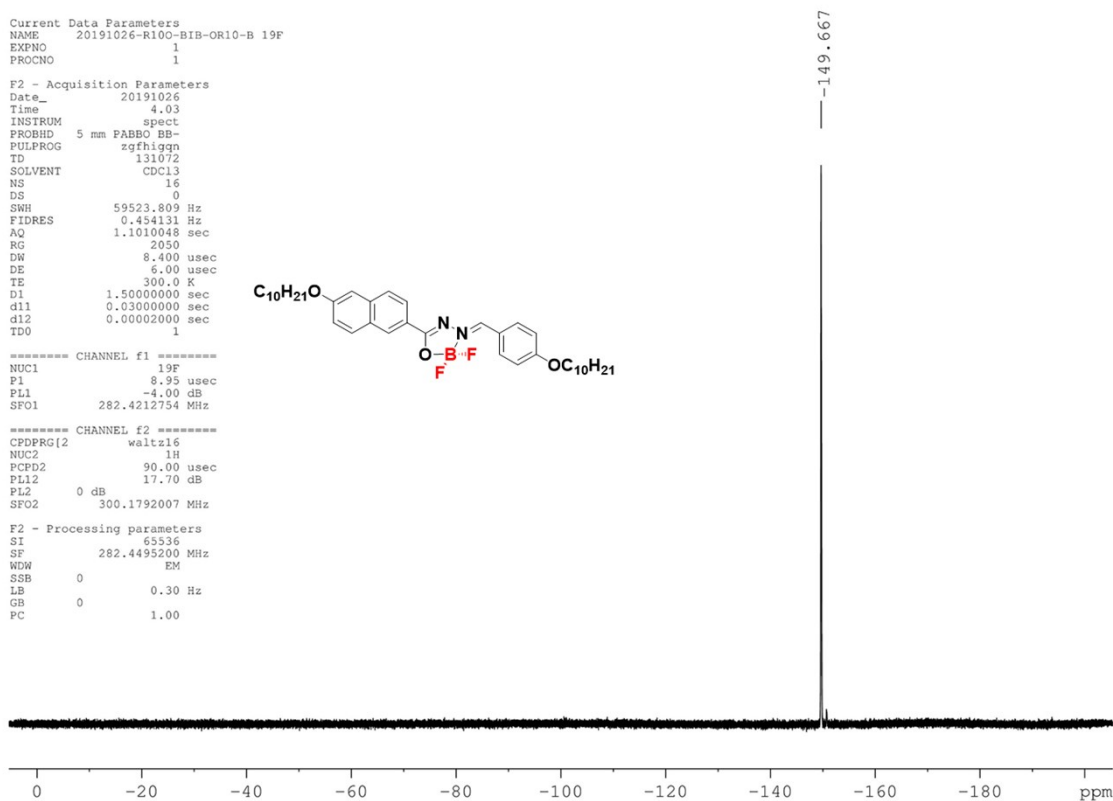

Fig. S25 The  $^{19}\text{F}$ -NMR spectrum of compound **1b-BF<sub>2</sub>** (n = 10).

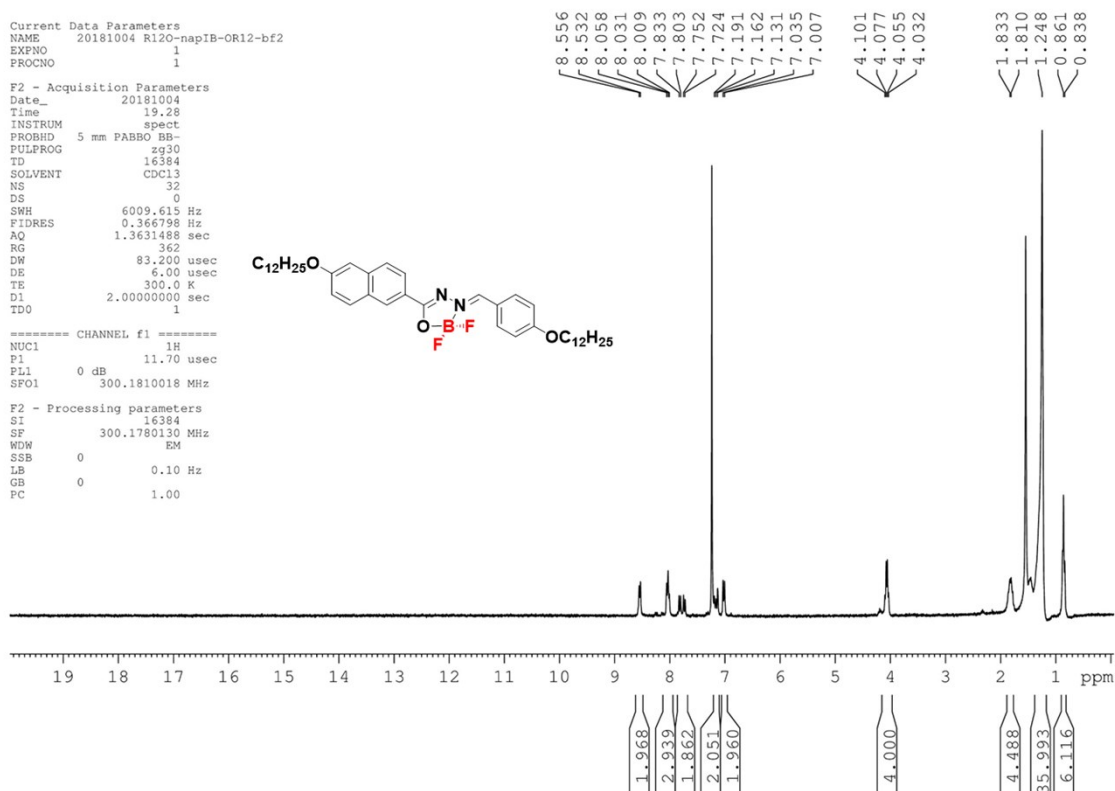

**Fig. S26** The  $^1\text{H}$  spectrum of compound **1b-BF<sub>2</sub>** (n = 12).

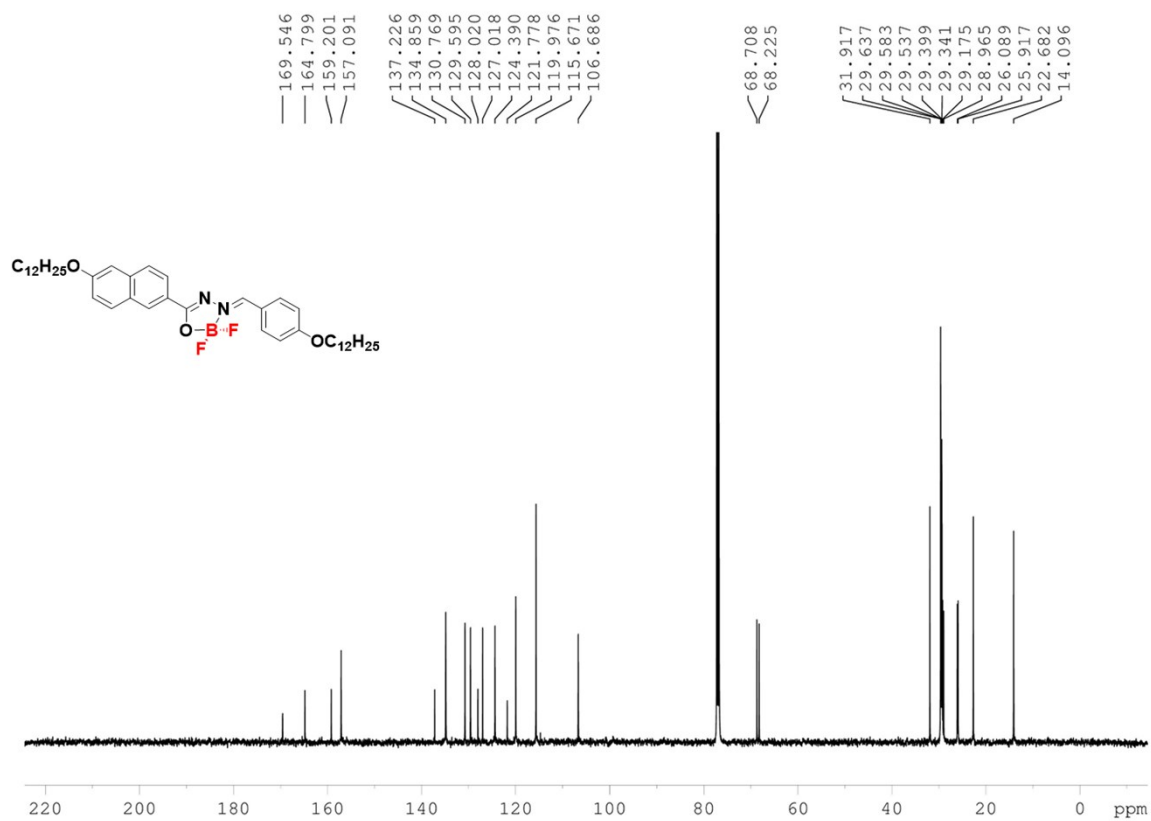

**Fig. S27** The  $^{13}\text{C}$  NMR spectrum of compound **1b-BF<sub>2</sub>** (n = 12).

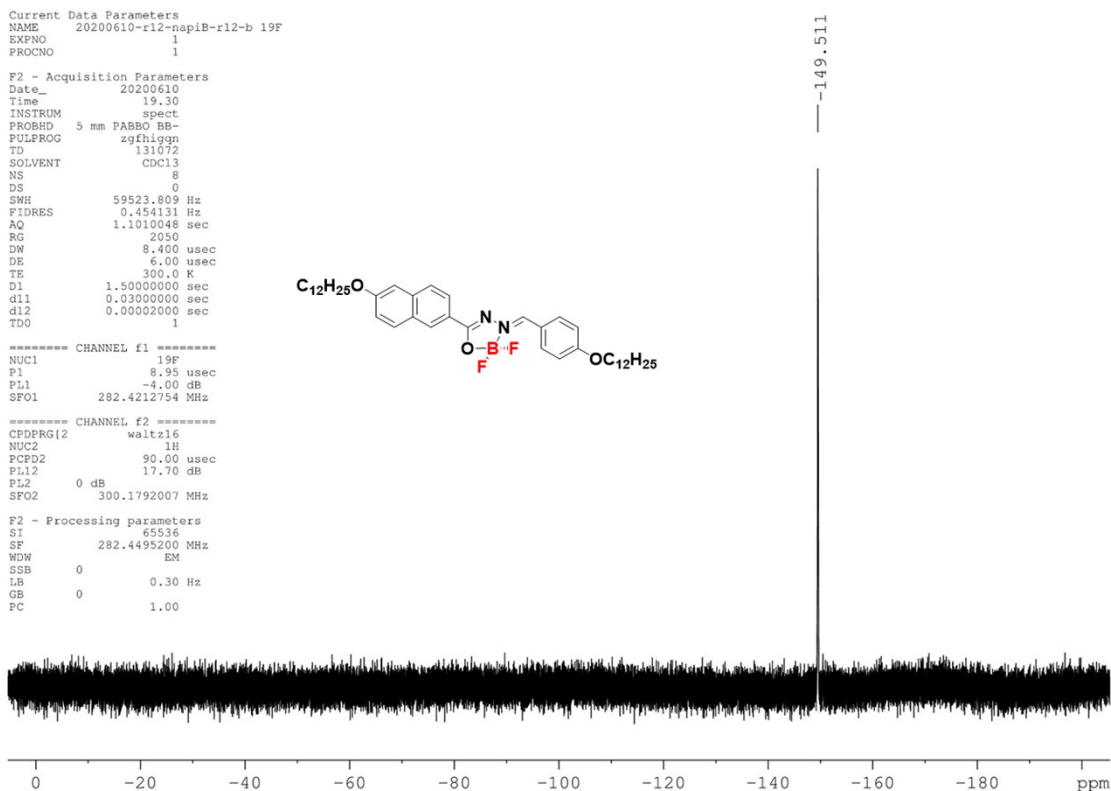

Fig. S28 The  $^{19}\text{F}$ -NMR spectrum of compound **1b-BF<sub>2</sub>** (n = 12).

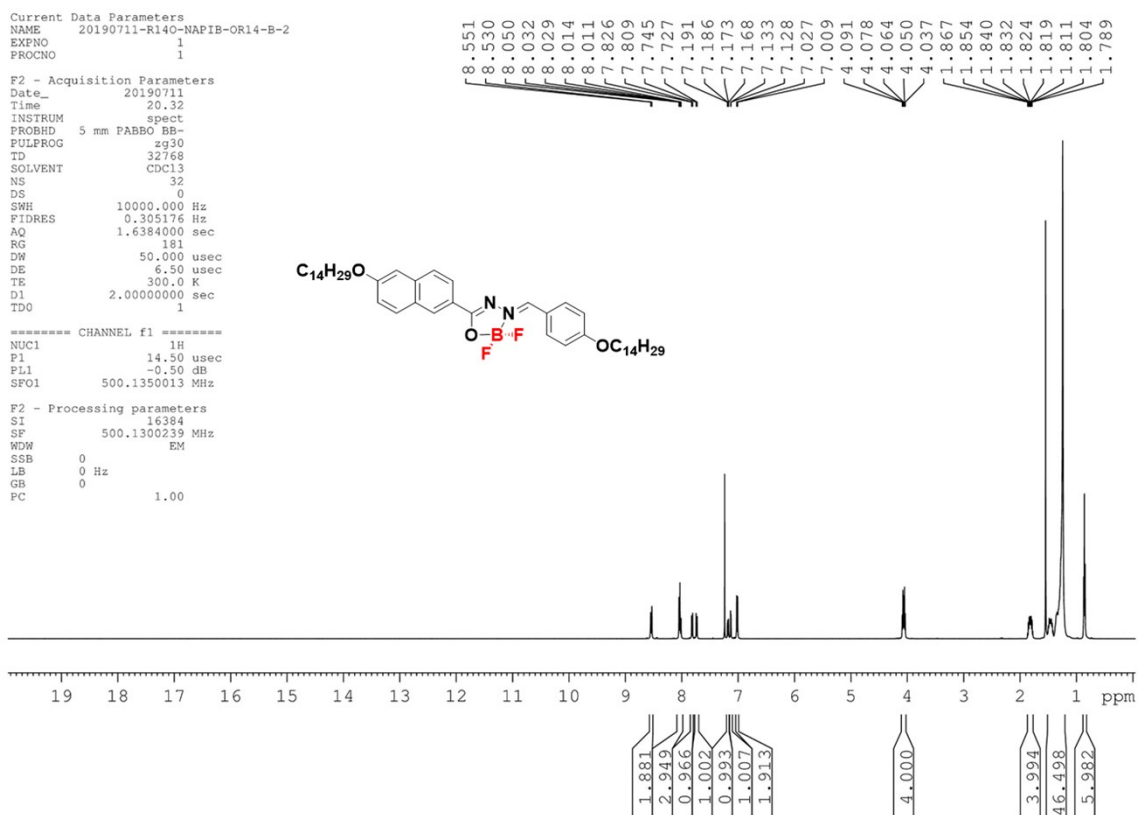

Fig. S29 The  $^1\text{H}$  spectrum of compound **1b-BF<sub>2</sub>** (n = 14).



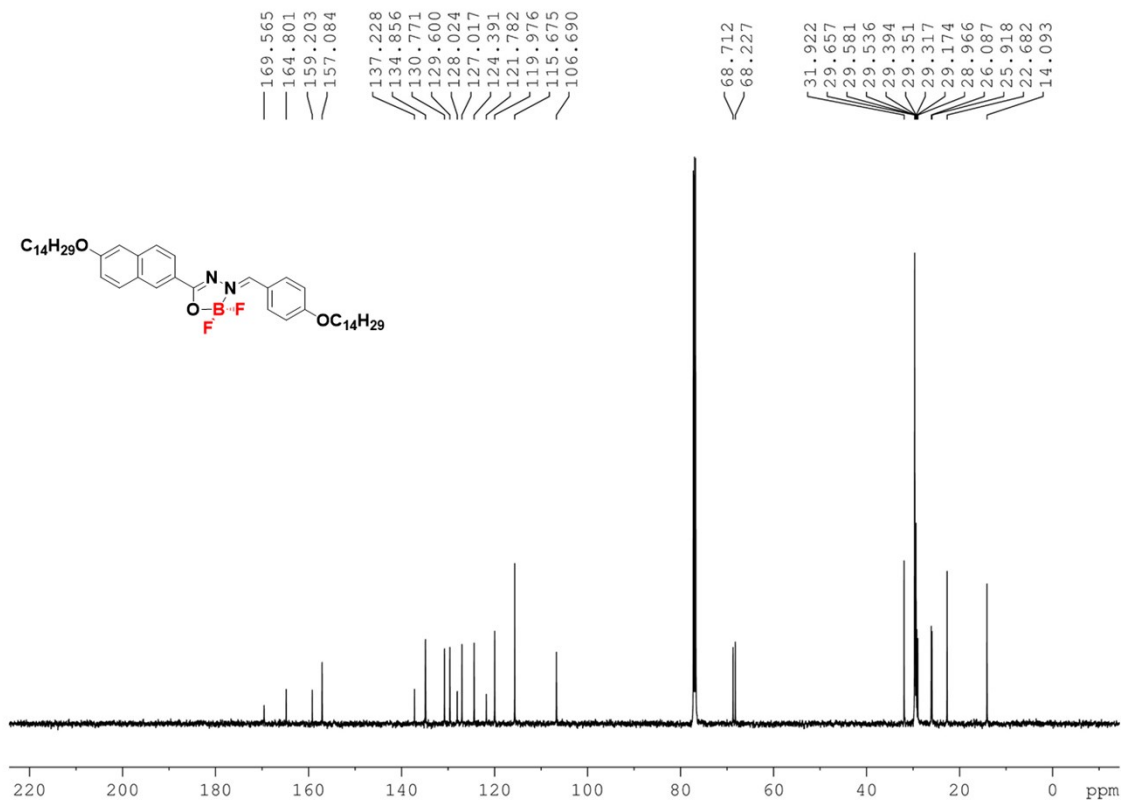

**Fig. S30** The <sup>13</sup>C NMR spectrum of compound **1b-BF<sub>2</sub>** (n = 14).

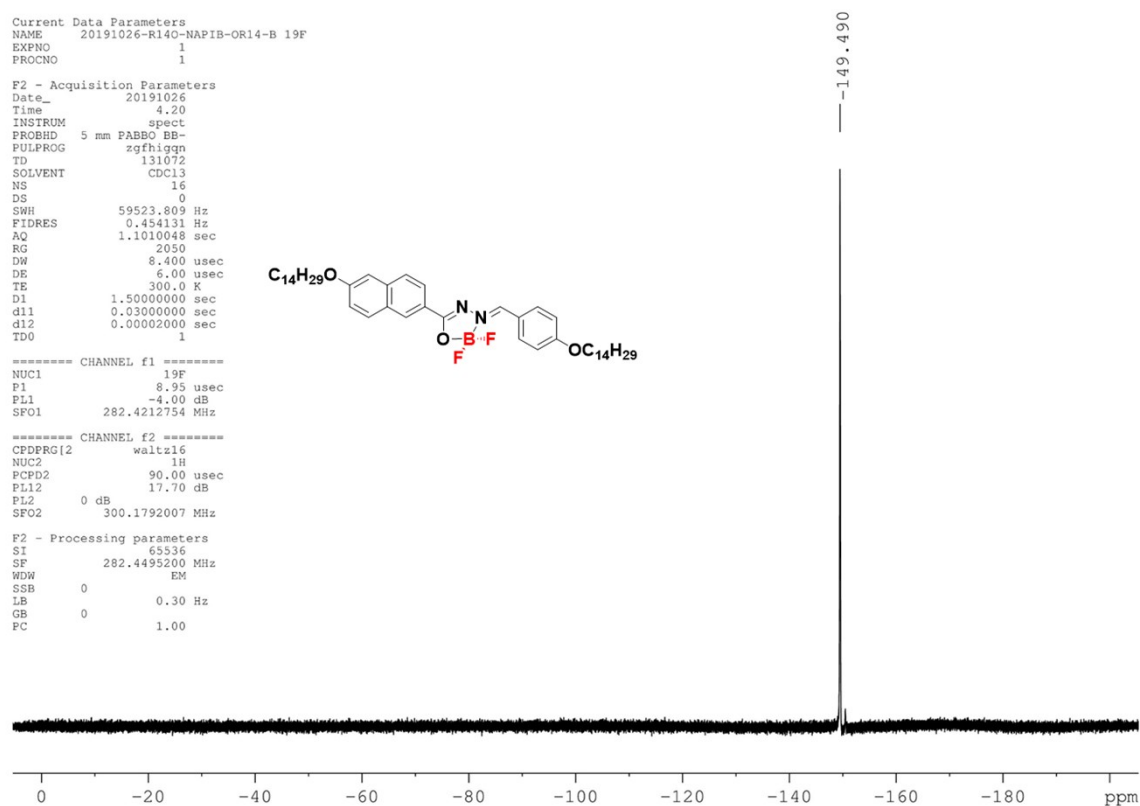

**Fig. S31** The <sup>19</sup>F-NMR spectrum of compound **1b-BF<sub>2</sub>** (n = 14).

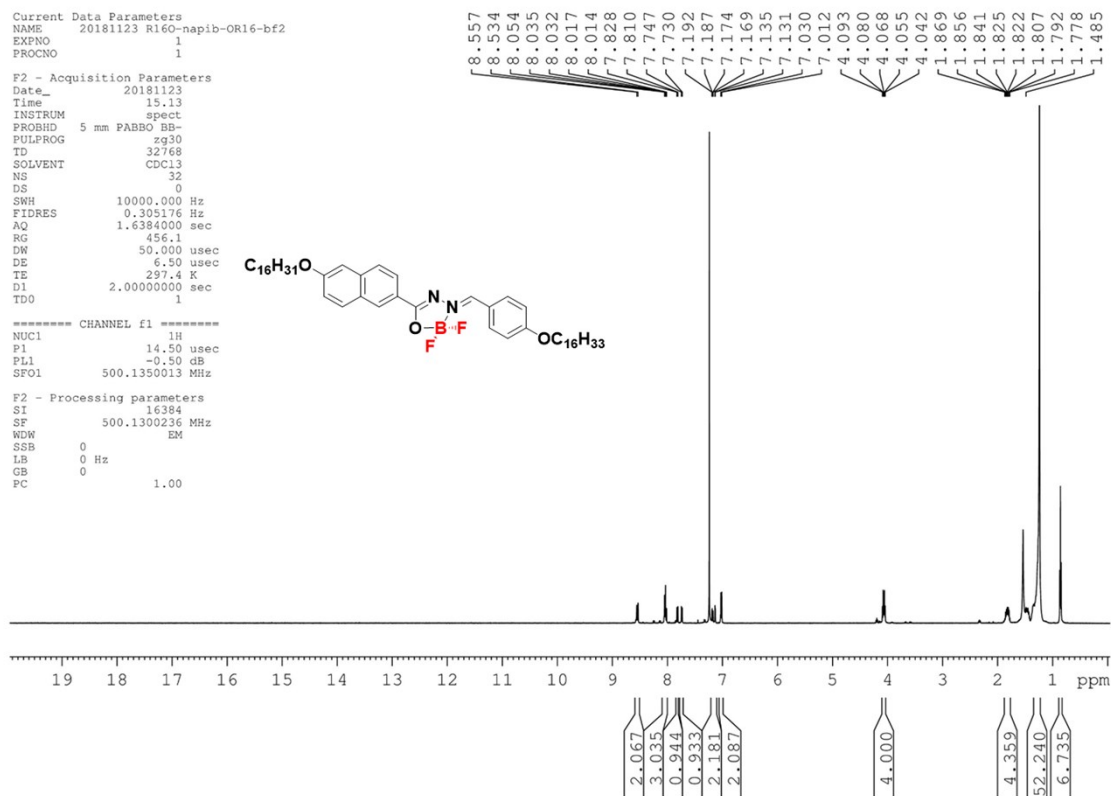

Fig. S32 The  $^1\text{H}$  spectrum of compound **1b-BF<sub>2</sub>** (n = 16).

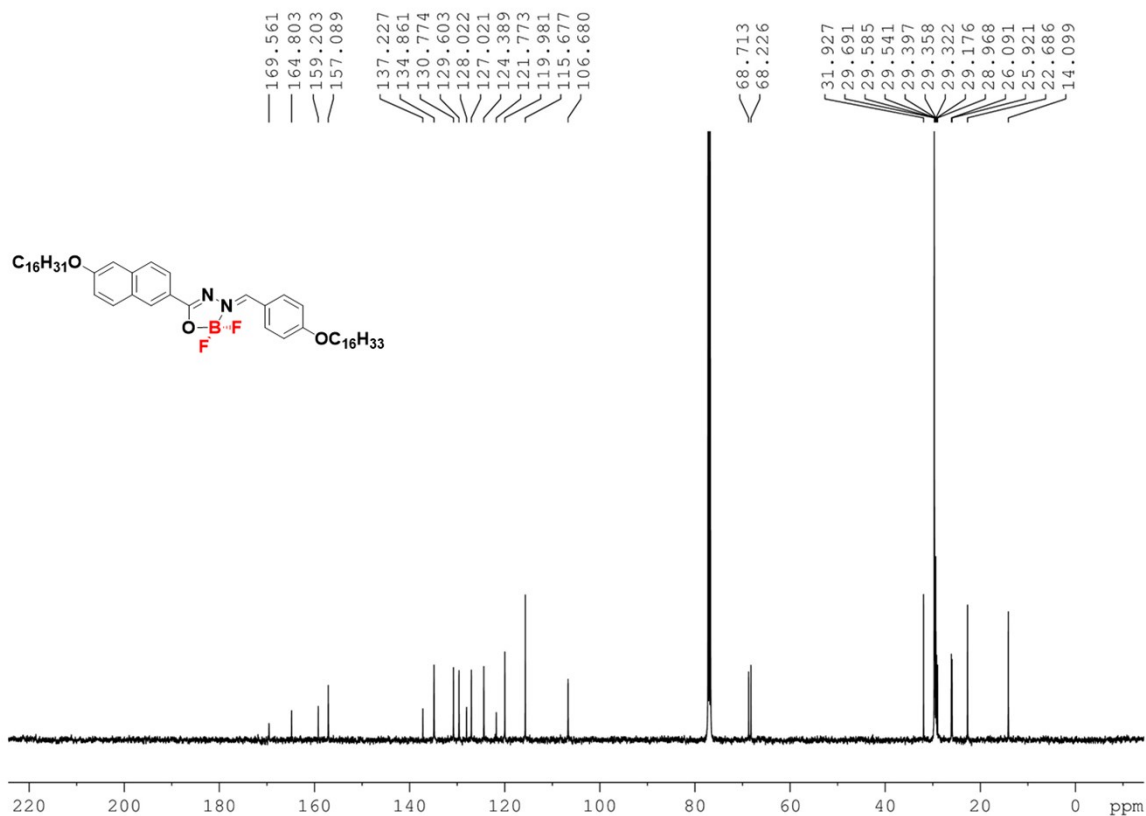

Fig. S33 The  $^{13}\text{C}$  NMR spectrum of compound **1b-BF<sub>2</sub>** (n = 16).

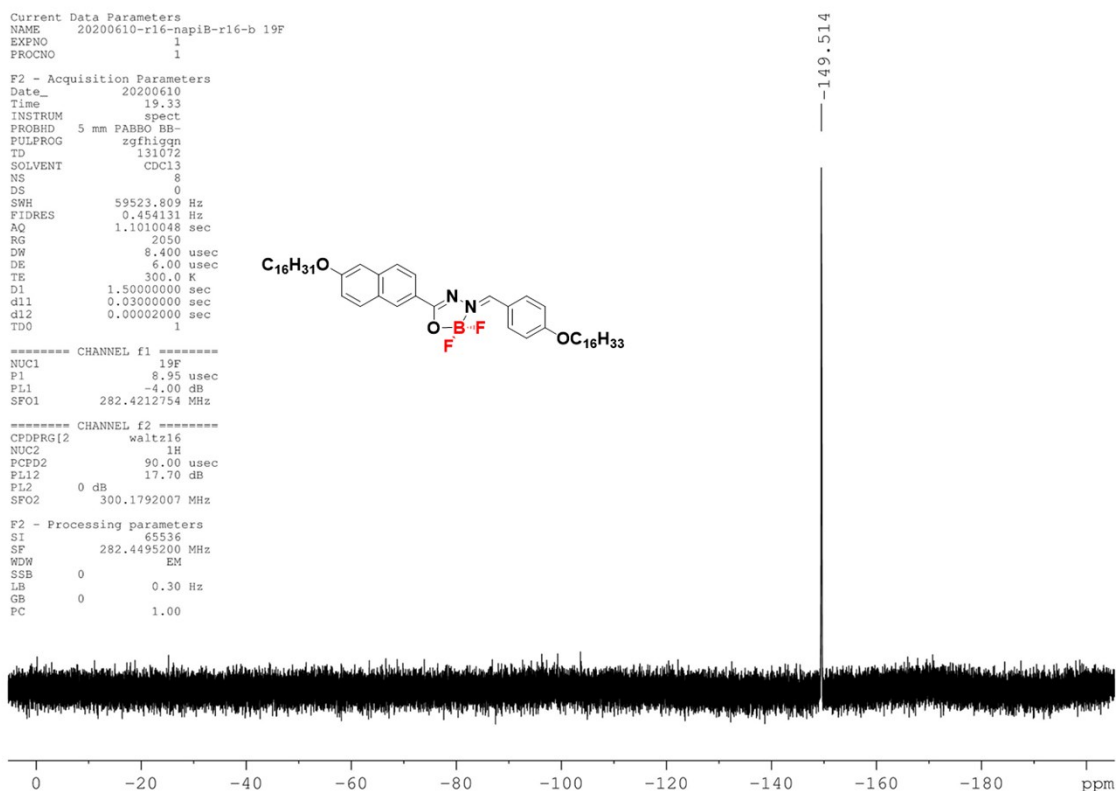

Fig. S34 The  $^{19}\text{F}$ -NMR spectrum of compound **1b-BF<sub>2</sub>** (n = 16).

## 2. The DSC Thermographs of Compounds **1a-BF<sub>2</sub>** (n = 8)

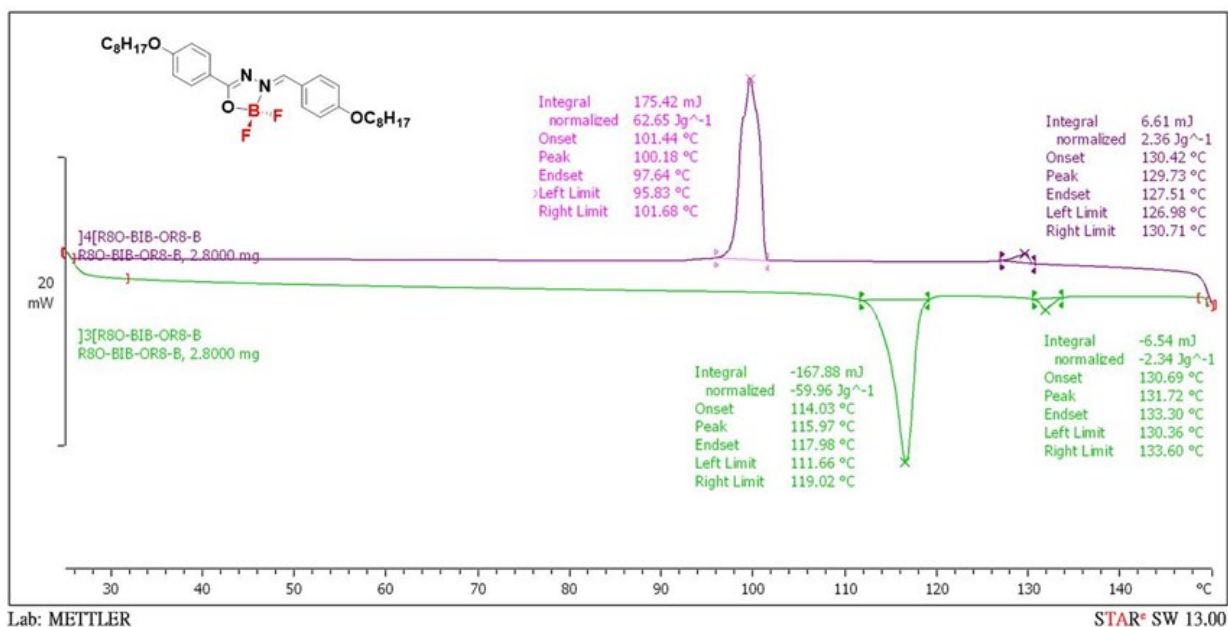

Fig. S35 DSC thermograph of compound **1a-BF<sub>2</sub>** (n = 8).
